# Supplementary material
Source: Springer Nature journal article supplement (https://www.springermedizin.de/resource/supplementary/13058_2005_1349_MOESM4_ESM.pdf/9698916)

# S-4: T47D Karyogram

red and green lines represent +1.0 and -1.0 log<sub>2</sub> ratio scale references respectively

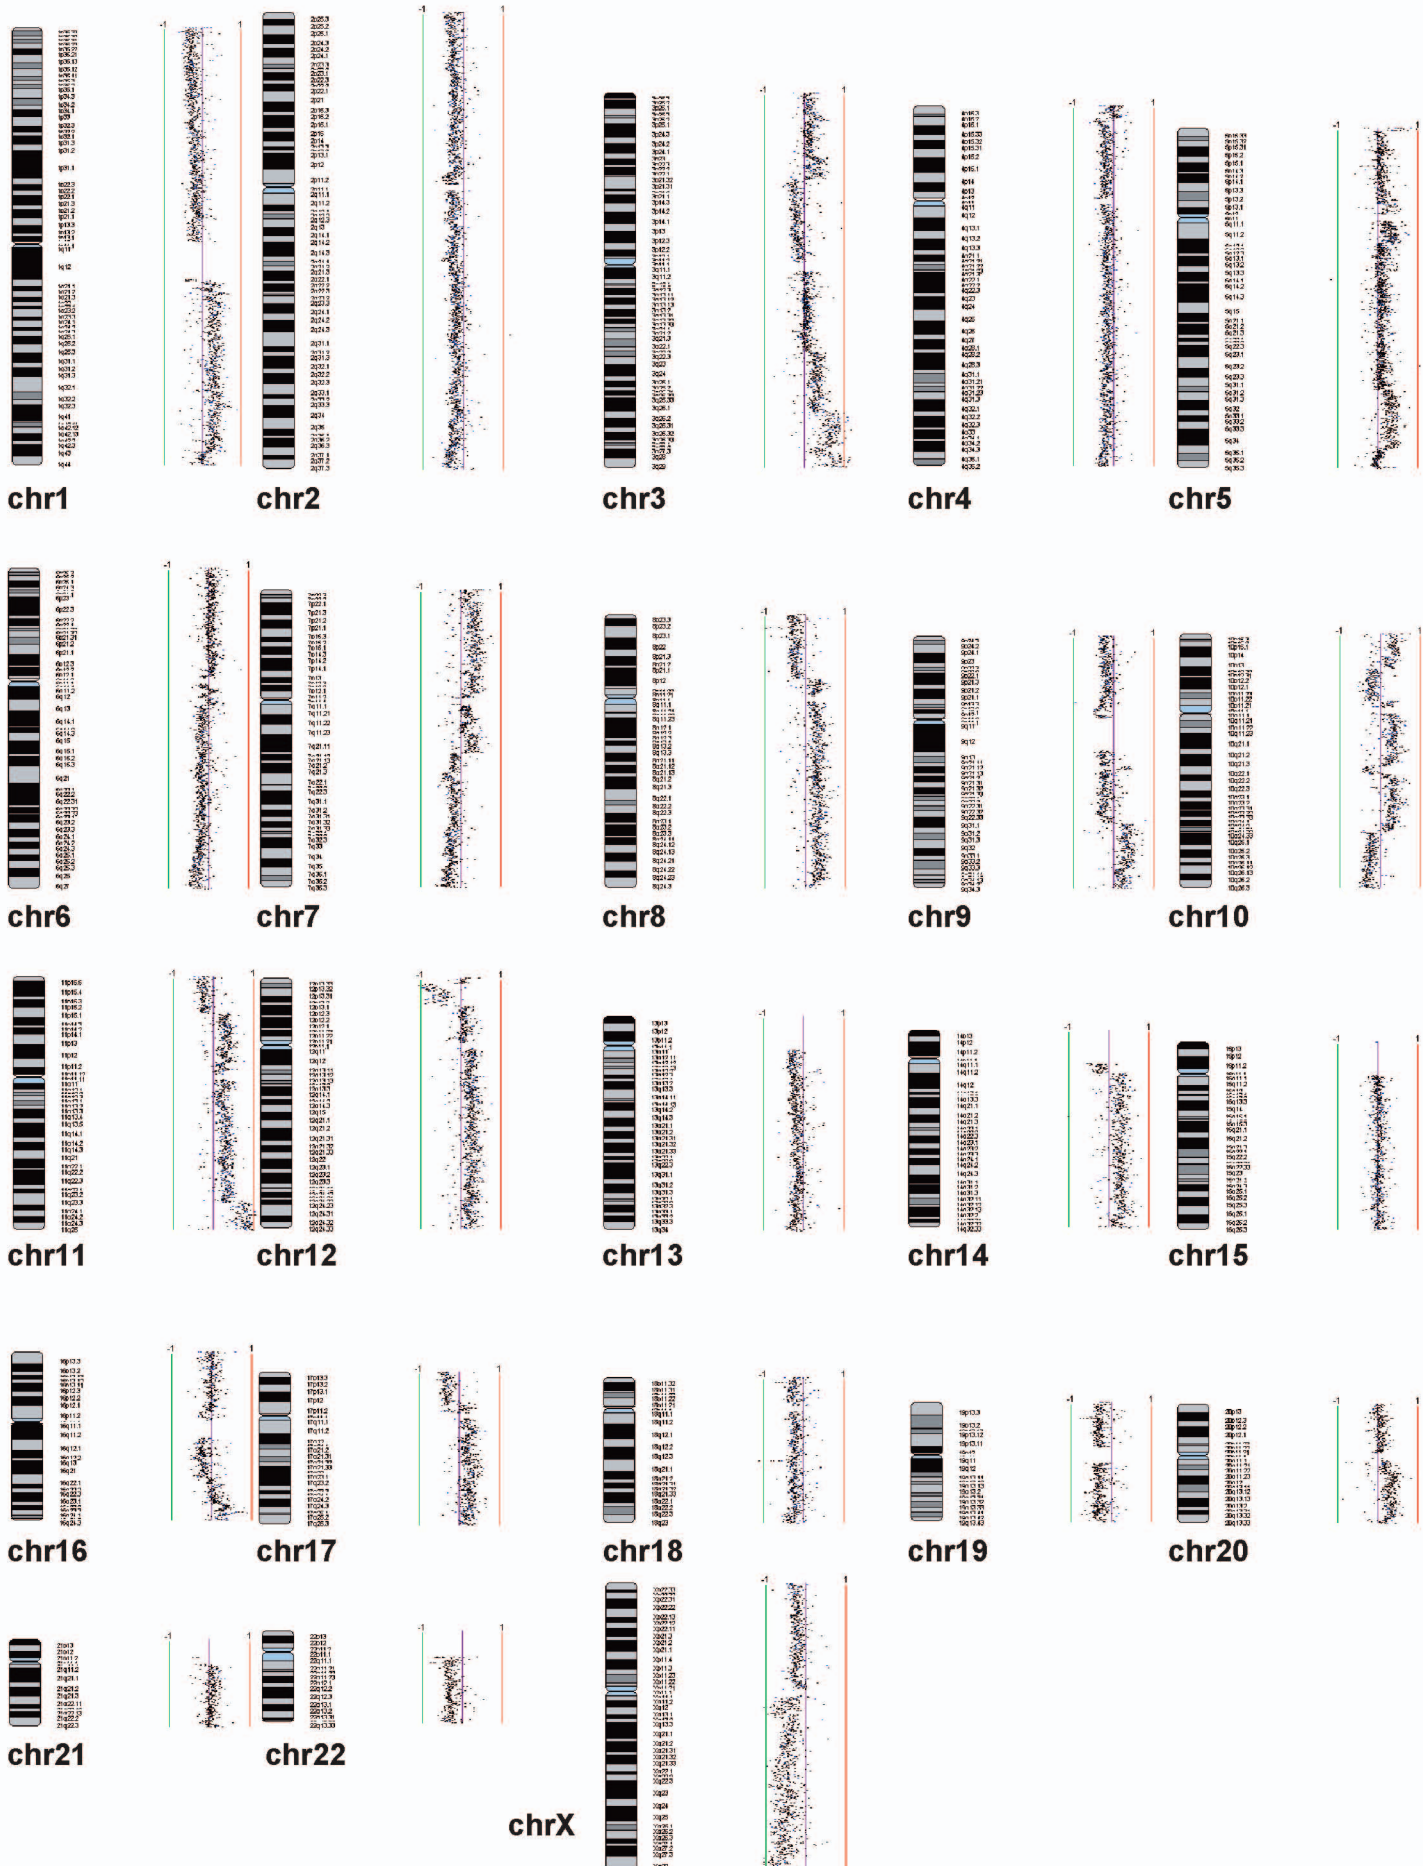

Supplement: MOESM4 [file 9698916]
